# Supplementary material for: IL33-mediated ILC2 activation and neutrophil IL5 production in the lung response after severe trauma: A reverse translation study from a human cohort to a mouse trauma model
Source: PLoS Med. 2017 Jul 25;14(7):e1002365. doi: 10.1371/journal.pmed.1002365 (PMC5526517; doi:10.1371/journal.pmed.1002365)

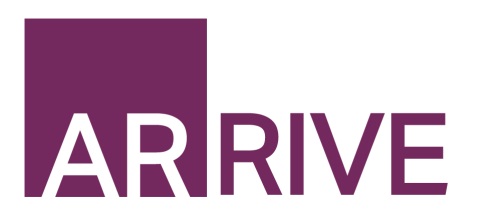


The ARRIVE Guidelines Checklist

Animal Research: Reporting In Vivo Experiments

Carol Kilkenny1, William J Browne2, Innes C Cuthill3, Michael Emerson4 and Douglas G Altman5

*1The National Centre for the Replacement, Refinement and Reduction of Animals in Research, London, UK, 2School of Veterinary Science, University of Bristol, Bristol, UK, 3School of Biological Sciences, University of Bristol, Bristol, UK, 4National Heart and Lung Institute, Imperial College London, UK, 5Centre for Statistics in Medicine, University of Oxford, Oxford, UK.*

|  | | ITEM | RECOMMENDATION | Section/ Paragraph |
| --- | --- | --- | --- | --- |
| 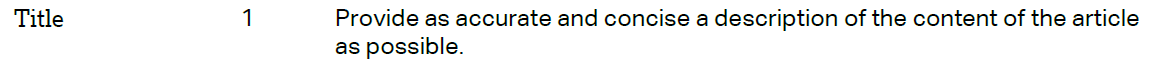 | | | Title |
| 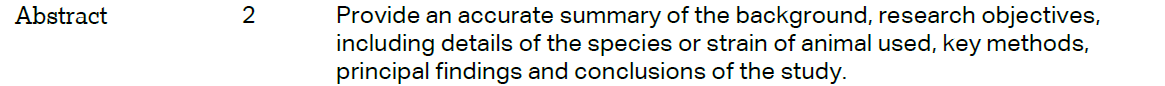 | | | Abstract/1-4 |
| INTRODUCTION | | |  |
| 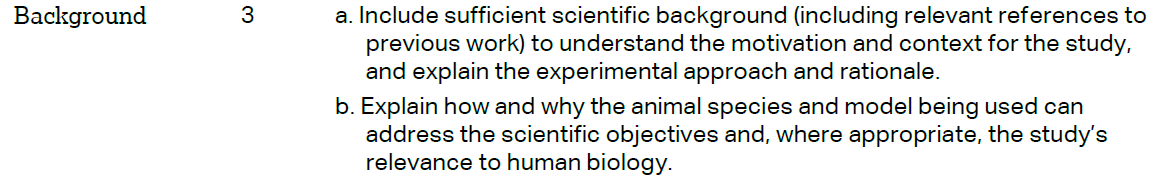 | | | Introduction/4 |
| 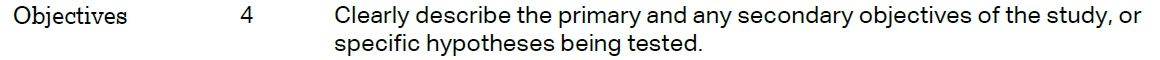 | | | Introduction/4 |
| METHODS | | |  |
| 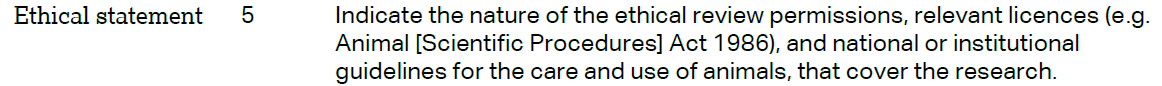 | | | Methods/3 |
| 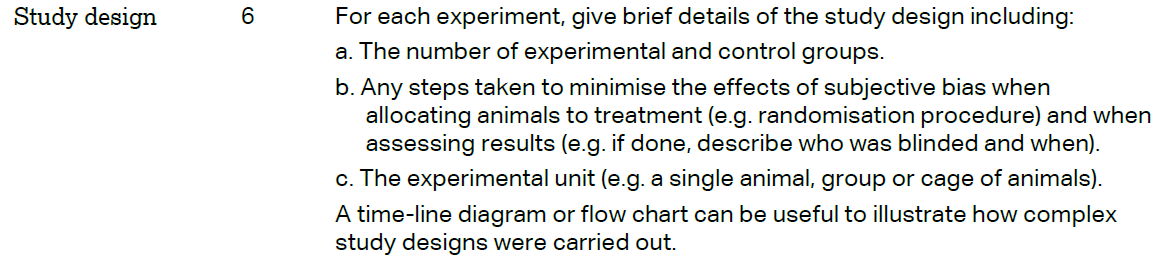 | | | Methods/4,6,9 Legends |
| 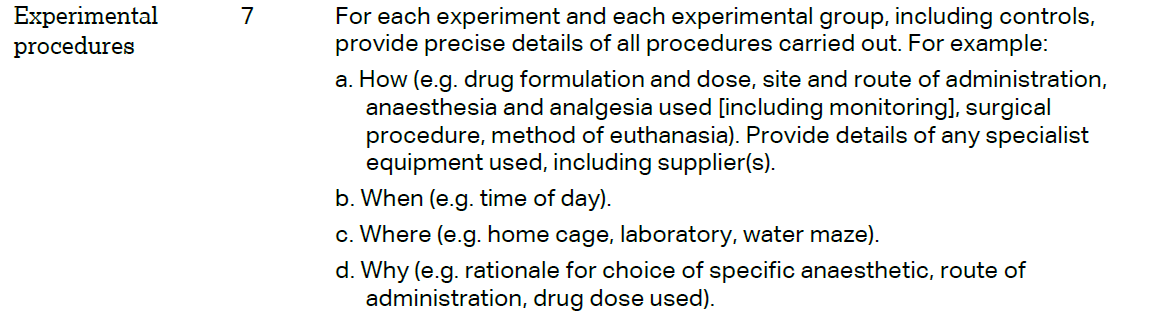 | | | Methods/4 |
| 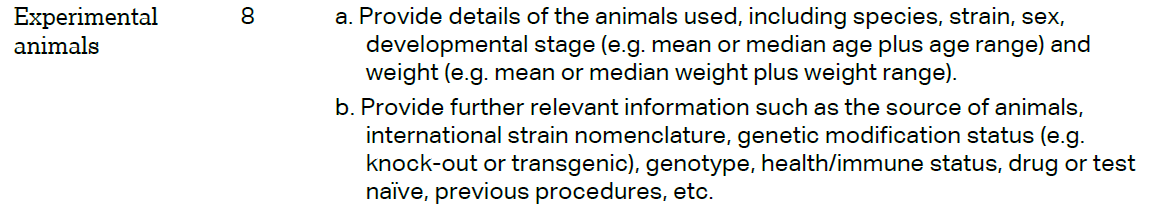 | | | Methods/3,4,6 |

The ARRIVE guidelines. Originally published in *PLoS Biology*, June 20101

| 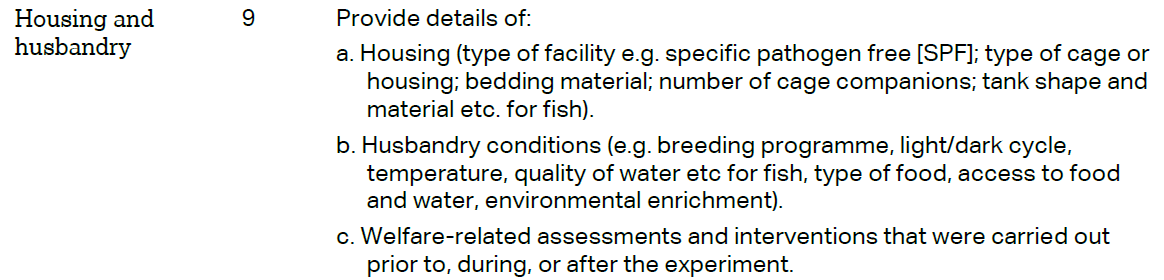 | Methods/3,4 | |
| --- | --- | --- |
| 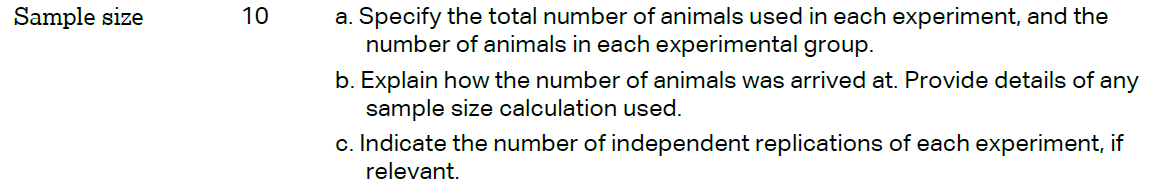 | Legends | |
| 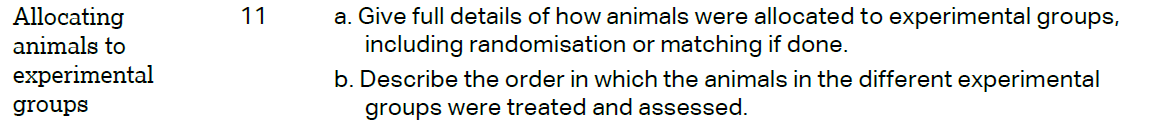 | Methods/4 | |
| 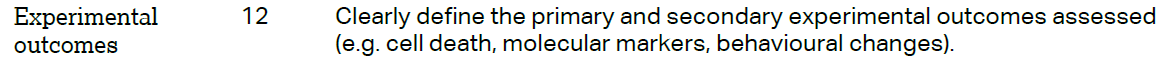 | Methods/5,7,8,9 | |
| 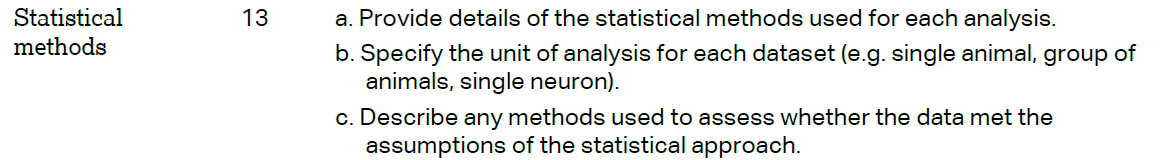 | Methods/10 | |
| RESULTS |  | |
| 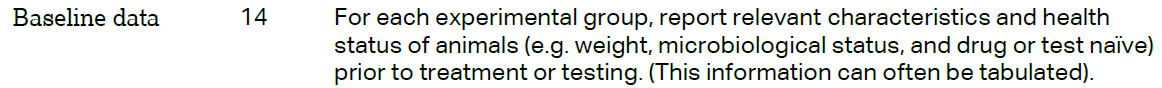 | Methods/4 | |
| 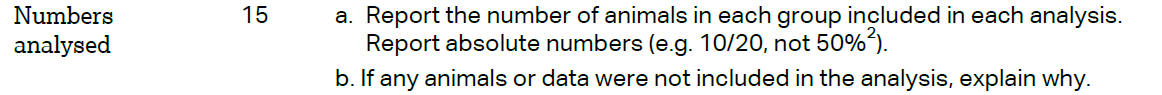 | Legends | |
| 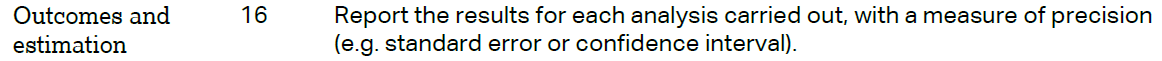 | Result Figures Legends | |
| 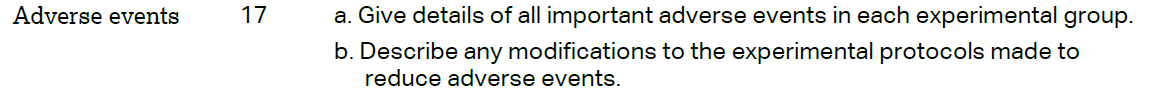 | Methods/4 | |
| DISCUSSION |  | |
| 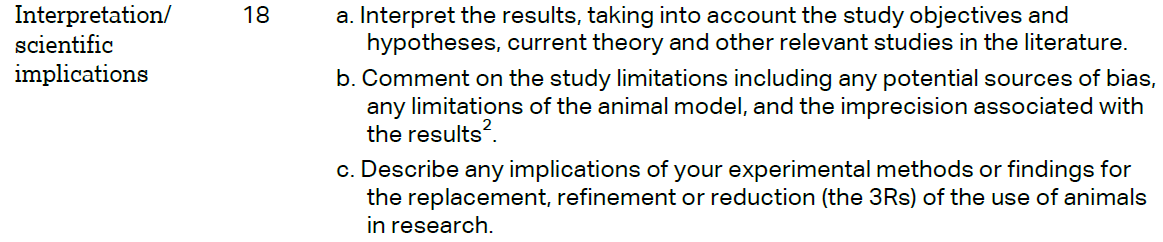 | Discussion/1,4,9 | |
| 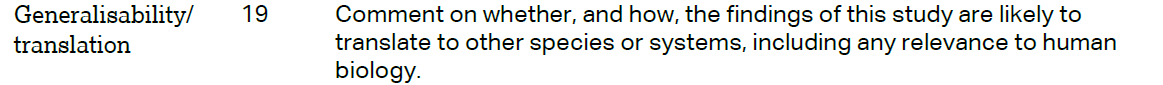 | Discussion/1 | |
| 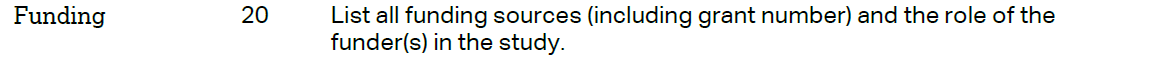 | | End of discussion |


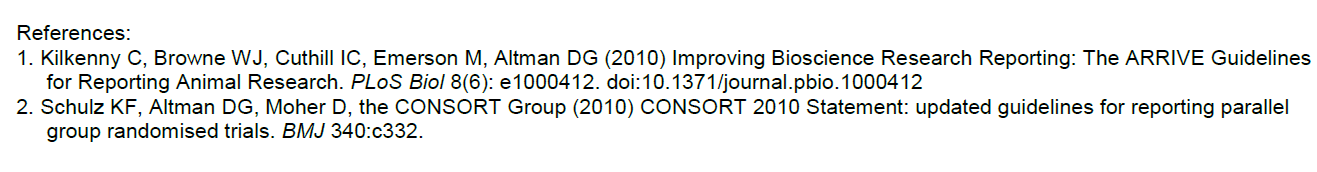

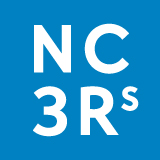

Supplement: S3 Text — (DOCX) [file pmed.1002365.s011.docx]
